# Supplementary material for: The epidemiological status of urogenital schistosomiasis among reproductive aged individuals in the Tiko Health Area- a semi-urban setting in the Mount Cameroon area
Source: PubMed Central journal article supplement (PMC7822554; doi:10.1371/journal.pntd.0008978), 2021-01-11
Supplement: pntd.0008978.s001.pdf [file pntd.0008978.s001.pdf]

## QUESTIONNAIRE

### A. PARTICIPANT'S IDENTITY

Code \_\_\_\_\_ Telephone Number \_\_\_\_\_

1. Sex: male: \_\_\_\_\_ Female: \_\_\_\_\_ 2. Age: \_\_\_\_\_ (years)
3. Area of residence: \_\_\_\_\_

### B. DEMOGRAPHIC INFORMATION

1. Level of educational attainment. Primary  Secondary  Tertiary
2. Marital status. Married  Single  Divorced  Widow
3. Occupation. Farming  Business  Student  Others (specify) \_\_\_\_\_

### C. HISTORY OF UROGENITAL SCHISTOSOMIASIS

4. How long have you live here? \_\_\_\_\_
5. Are you menstruating (for female)? Yes  No
6. Do you experience any pain when urinating? Yes  No
7. When you urinate is there blood in your urine? Yes  No
8. Have you ever heard of urogenital schistosomiasis? Yes  No
9. Have you been diagnosed of urogenital schistosomiasis before? Yes  No
10. When was the last time you took praziquantel? \_\_\_\_\_

### D. STREAM CONTACT BEHAVIOUR

11. a) Do you have tap/potable water in this community? Yes  No   
b) If yes in (a) above what is the source from which it is taped? a) Treated source b) stream  
c) If yes in (a) above, is the tap always flowing? Yes  No
12. Where do you fetch water for domestic use? a) Stream b) Tap c) Both

13. What is the distance from your house to the stream? ----- (m)

14. What are the activities you carry out at the Stream? Bathing  Laundry

Fetch water  Washing pumpkin seeds (egusi)  Washing motorbike

Crossing

15. How often do you go to the stream per week? Once  Twice  Thrice

More than thrice
